# Supplementary material for: Light response behaviors of amorphous In–Ga–Zn–O thin-film transistors via in situ interfacial hydrogen doping modulation
Source: Royal Society of Chemistry journal article supplement (doi:10.1039/c9ra09646a), 2020-01-01
Supplement: c9ra09646a1.pdf [file c9ra09646a1.pdf]

## Electronic Supplementary Information

### *In-situ* Interfacial Hydrogen Doping of Room Temperature Fabricated Flexible a-IGZO Thin Film Transistors for High-performance Photodetection

Xiao-Lin Wang<sup>†</sup>, Yan Shao<sup>†</sup>, Xiaohan Wu<sup>\*</sup>, Mei-Na Zhang, Lingkai Li, Wen-Jun Liu, David Wei Zhang and Shi-Jin Ding<sup>\*</sup>

State Key Laboratory of ASIC and System, School of Microelectronics, Fudan University, Shanghai 200433, China.

Email: [sjding@fudan.edu.cn](mailto:sjding@fudan.edu.cn); [wuxiaohan@fudan.edu.cn](mailto:wuxiaohan@fudan.edu.cn).

<sup>†</sup> These authors contributed equally to this work.

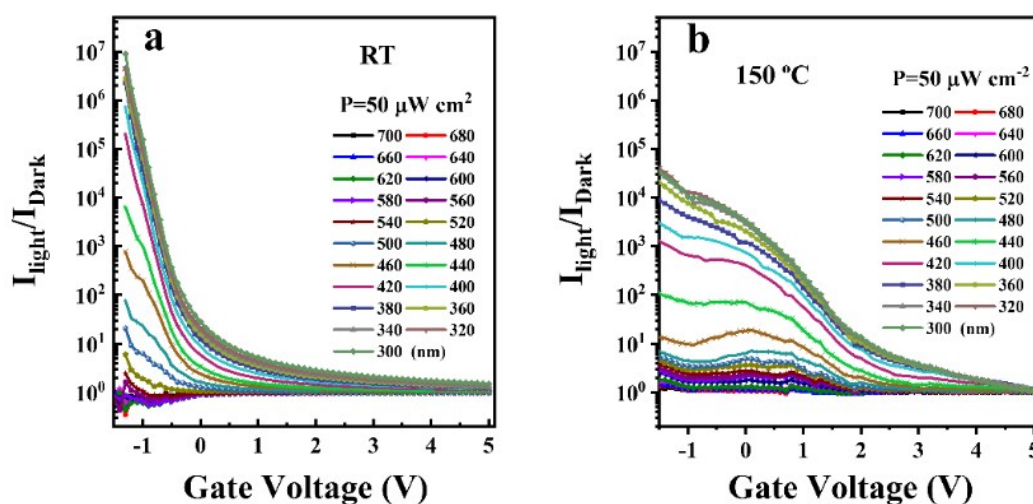

Figure S1.  $I_{\text{light}}/I_{\text{dark}}$  versus gate voltage curves under light with different wavelengths of (a) the RT and (b) 150 °C TFT.

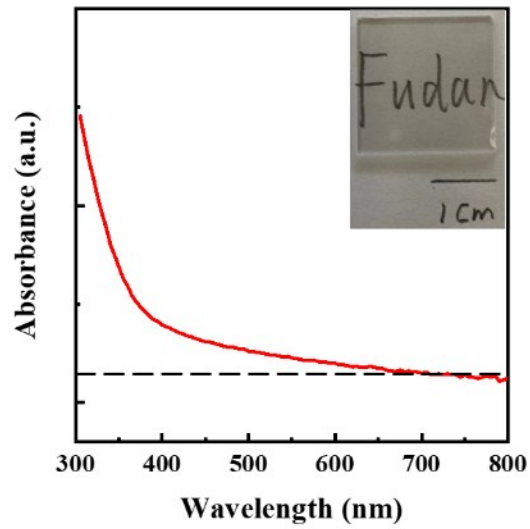

Figure S2. UV-vis absorption spectrum of the RT fabricated a-IGZO channel and  $\text{Al}_2\text{O}_3$  dielectric films deposited on a quartz glass (the inner is the image of the films).

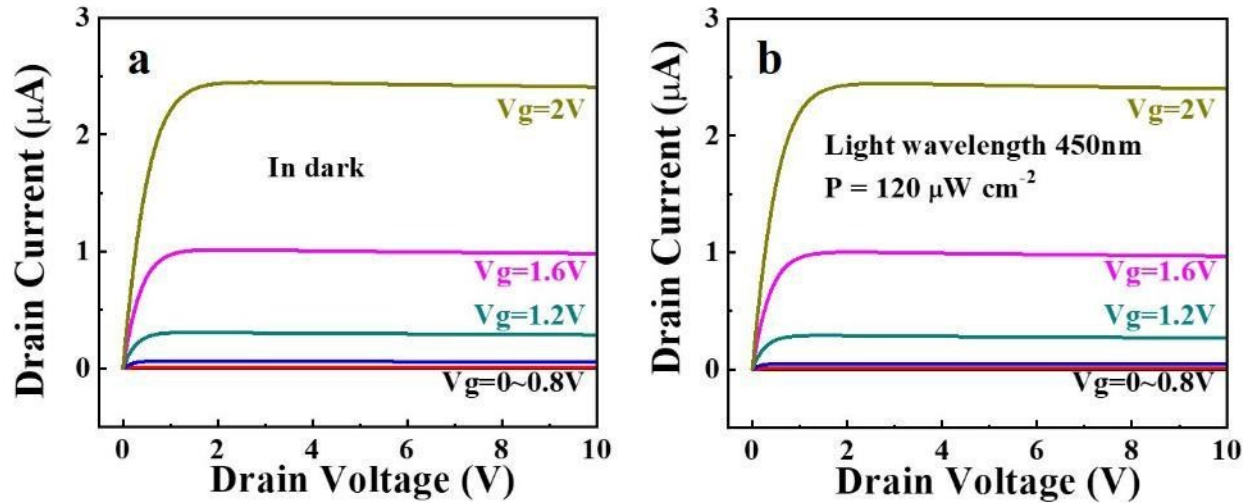

Figure S3. Output curves of the 150 °C TFT (a) in dark and (b) under light with wavelength of 450 nm.

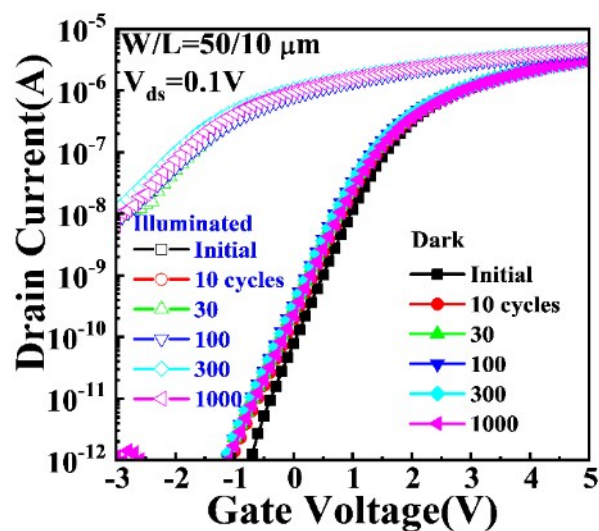

Figure S4. Transfer curves of flexible device with different bending cycles.

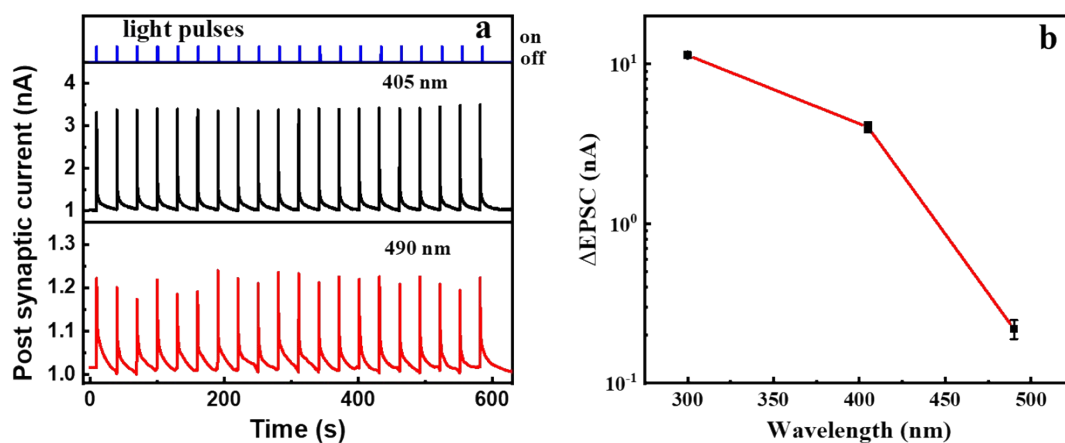

Figure S5 (a) The post synaptic current of the RT  $\text{Al}_2\text{O}_3$  device recorded at  $V_{ds}=0.1$  V,  $V_g=0$  V in response to the 405 nm and 490 nm light pulses. The intensity, width and interval of light pulse train are  $100 \mu\text{W}\cdot\text{cm}^{-2}$ , 100 ms, and 30 s. (b) The  $\Delta\text{EPSC}$  of RT  $\text{Al}_2\text{O}_3$  device illuminated at different wavelength light.
